# Supplementary material for: Discovery of a novel phosphoinositide 3-kinase gamma (PI3Kγ) inhibitor against hematologic malignancies and theoretical studies on its PI3Kγ-specific binding mechanisms
Source: Royal Society of Chemistry journal article supplement (doi:10.1039/c9ra02649e), 2019-01-01
Supplement: c9ra02649e1.pdf [file c9ra02649e1.pdf]

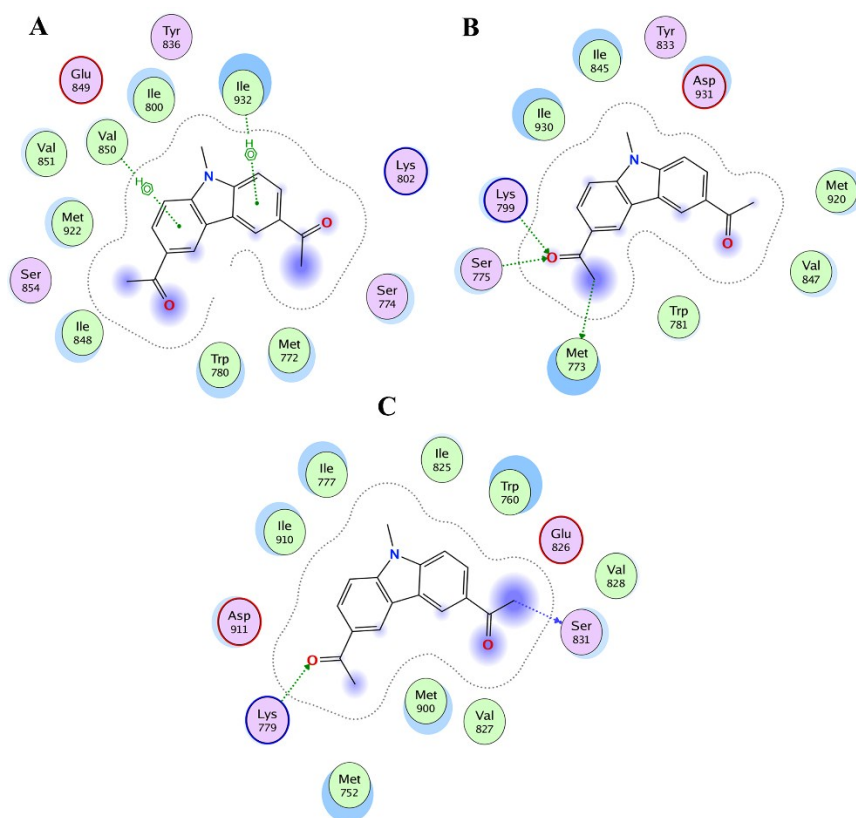

**Figure S1.** The 2D presentations of the interactions between JN-PK1 and PI3K $\alpha$  (A)/PI3K $\beta$  (B)/PI3K $\delta$  (C).

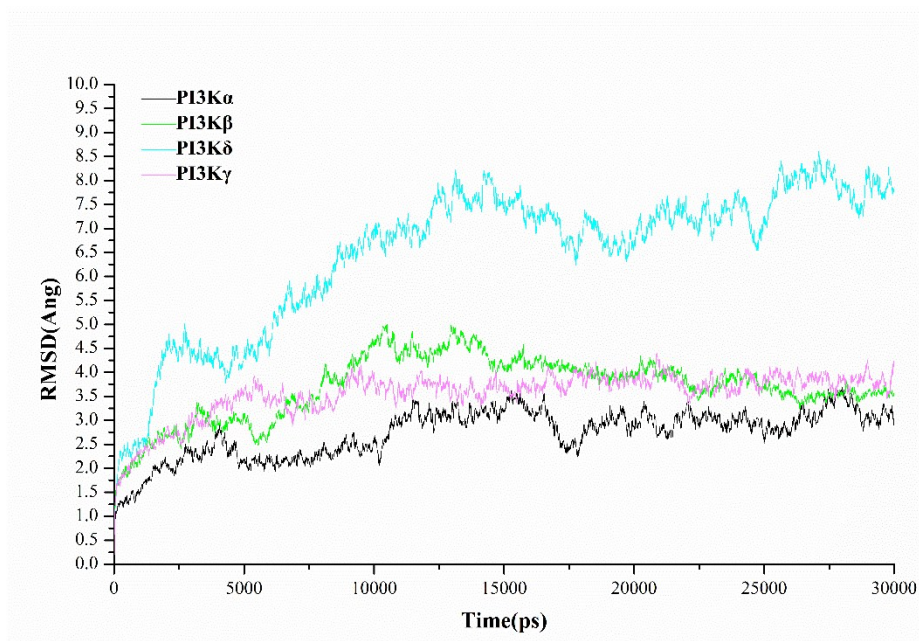

**Figure S2.** The root-mean-square deviations (RMSDs) of the binding pockets of the PI3K kinase/JN-PK1 complexes.

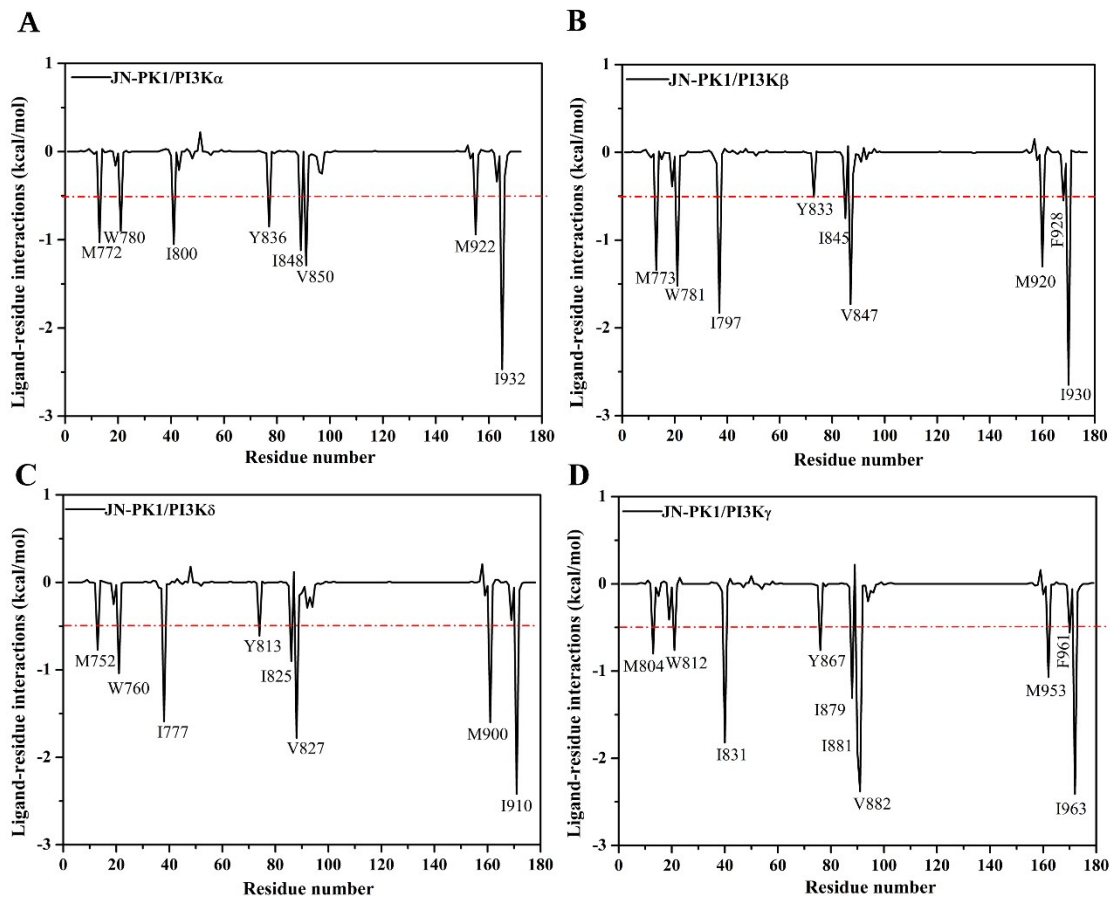

**Figure S3.** The JN-PK1-residue interaction spectra for PI3K $\alpha$  (A)/ PI3K $\beta$  (B)/ PI3K $\delta$  (C)/ PI3K $\gamma$  (D).
